# Supplementary material for: Preparation of iron oxide nanoparticles functionalized with Y-shaped ligands for brain tumor targeting
Source: Royal Society of Chemistry journal article supplement (doi:10.1039/c6tb01894g), 2016-01-01
Supplement: c6tb01894g1.pdf [file c6tb01894g1.pdf]

## Supporting Information

### Preparation of iron oxide nanoparticles with Y-shaped ligands for brain tumor targeting

Gwangjin Noh <sup>a</sup>, Yu Seok Youn <sup>b</sup>, Eun Seong Lee <sup>a,\*</sup>

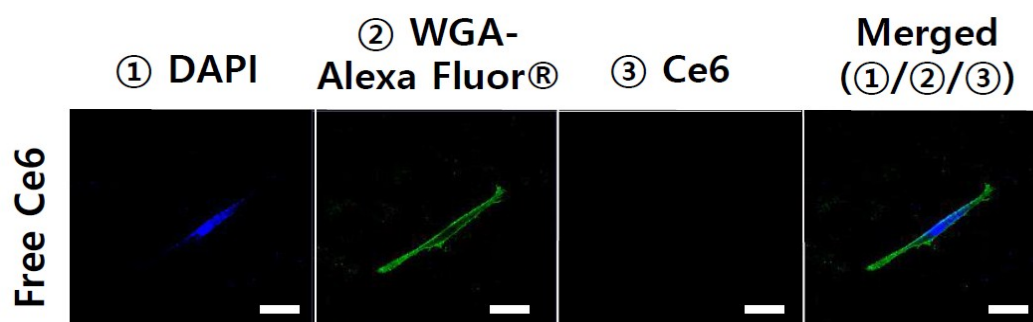

**Fig. S1.** Confocal images of U87-MG cells treated with free Ce6 (10  $\mu\text{g}/\text{mL}$ ) for 4 h at 37  $^{\circ}\text{C}$ . The treated cells were stained using DAPI and WGA-Alexa Fluor<sup>®</sup> 488 (bar scale: 10  $\mu\text{m}$ ).
